# Supplementary material
Source: Springer Nature journal article supplement (https://www.springermedizin.de/resource/supplementary/12936_2011_2028_MOESM2_ESM.pdf/9543376)

A

Absorbance [mÅ]

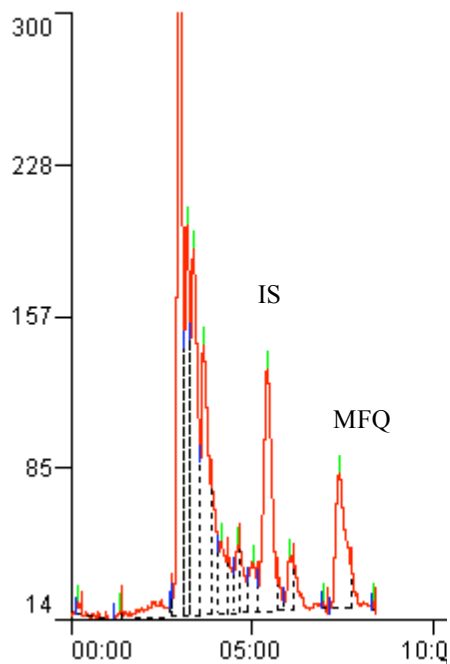

B

Absorbance [mÅ]

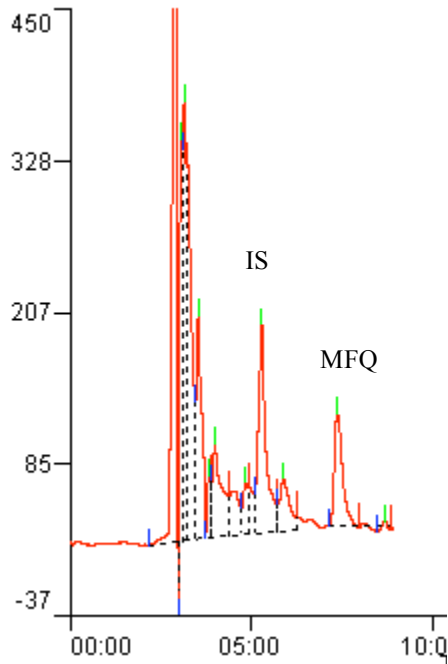

Supplement: MOESM2 [file 9543376]
